# Supplementary material
Source: MDPI journal article supplement (https://www.mdpi.com/2071-1050/11/9/2598)
Supplement: s1 [file s1]

**Supplementary Text S1.** Survey questions regarding the awareness of the interviewees about land use change, the benefits of nature, importance of ecosystem services (ESs), improvement or degradation of ESs, and the reasons behind changes in ESs.

**1. Questions for the awareness of the interviewees about land use change and the benefits of nature**

1) Do you believe that the Manas region experiences oasisization? Oasisization is the process of transforming a natural desert into a man-made oasis to meet the requirements of social development.

☐ Yes ☐ No

2) Do you believe that the Manas region experiences urbanization?

☐ Yes ☐ No

3) Are you aware of the benefits of nature in Manas?

☐ Yes ☐ No

**2. Awareness of the interviewees about the importance of ESs**

The following items are ESs provided by nature in the Manas region. How important are they to you? Please mark your answer on the basis of the importance of various ESs in Table S1.

**Table S1.** Importance of ESs.

| ESs                         | Scores of ESs importance     |                              |                              |                              |                              |                              |                              |                              |                              |                            |
|-----------------------------|------------------------------|------------------------------|------------------------------|------------------------------|------------------------------|------------------------------|------------------------------|------------------------------|------------------------------|----------------------------|
| Crop production             | <input type="checkbox"/> 0.1 | <input type="checkbox"/> 0.2 | <input type="checkbox"/> 0.3 | <input type="checkbox"/> 0.4 | <input type="checkbox"/> 0.5 | <input type="checkbox"/> 0.6 | <input type="checkbox"/> 0.7 | <input type="checkbox"/> 0.8 | <input type="checkbox"/> 0.9 | <input type="checkbox"/> 1 |
| Livestock                   | <input type="checkbox"/> 0.1 | <input type="checkbox"/> 0.2 | <input type="checkbox"/> 0.3 | <input type="checkbox"/> 0.4 | <input type="checkbox"/> 0.5 | <input type="checkbox"/> 0.6 | <input type="checkbox"/> 0.7 | <input type="checkbox"/> 0.8 | <input type="checkbox"/> 0.9 | <input type="checkbox"/> 1 |
| Soil conservation           | <input type="checkbox"/> 0.1 | <input type="checkbox"/> 0.2 | <input type="checkbox"/> 0.3 | <input type="checkbox"/> 0.4 | <input type="checkbox"/> 0.5 | <input type="checkbox"/> 0.6 | <input type="checkbox"/> 0.7 | <input type="checkbox"/> 0.8 | <input type="checkbox"/> 0.9 | <input type="checkbox"/> 1 |
| Water yield                 | <input type="checkbox"/> 0.1 | <input type="checkbox"/> 0.2 | <input type="checkbox"/> 0.3 | <input type="checkbox"/> 0.4 | <input type="checkbox"/> 0.5 | <input type="checkbox"/> 0.6 | <input type="checkbox"/> 0.7 | <input type="checkbox"/> 0.8 | <input type="checkbox"/> 0.9 | <input type="checkbox"/> 1 |
| Sand fixation               | <input type="checkbox"/> 0.1 | <input type="checkbox"/> 0.2 | <input type="checkbox"/> 0.3 | <input type="checkbox"/> 0.4 | <input type="checkbox"/> 0.5 | <input type="checkbox"/> 0.6 | <input type="checkbox"/> 0.7 | <input type="checkbox"/> 0.8 | <input type="checkbox"/> 0.9 | <input type="checkbox"/> 1 |
| Carbon sequestration        | <input type="checkbox"/> 0.1 | <input type="checkbox"/> 0.2 | <input type="checkbox"/> 0.3 | <input type="checkbox"/> 0.4 | <input type="checkbox"/> 0.5 | <input type="checkbox"/> 0.6 | <input type="checkbox"/> 0.7 | <input type="checkbox"/> 0.8 | <input type="checkbox"/> 0.9 | <input type="checkbox"/> 1 |
| Habitat                     | <input type="checkbox"/> 0.1 | <input type="checkbox"/> 0.2 | <input type="checkbox"/> 0.3 | <input type="checkbox"/> 0.4 | <input type="checkbox"/> 0.5 | <input type="checkbox"/> 0.6 | <input type="checkbox"/> 0.7 | <input type="checkbox"/> 0.8 | <input type="checkbox"/> 0.9 | <input type="checkbox"/> 1 |
| Nature landscape recreation | <input type="checkbox"/> 0.1 | <input type="checkbox"/> 0.2 | <input type="checkbox"/> 0.3 | <input type="checkbox"/> 0.4 | <input type="checkbox"/> 0.5 | <input type="checkbox"/> 0.6 | <input type="checkbox"/> 0.7 | <input type="checkbox"/> 0.8 | <input type="checkbox"/> 0.9 | <input type="checkbox"/> 1 |

**3. Questions for the cognition of the improvement or degradation of ESs**

1) Which ESs do you believe have improved?

☐ Crop production ☐ Livestock ☐ Soil conservation ☐ Water yield ☐ Sand fixation  
☐ Carbon sequestration ☐ Habitat ☐ Nature landscape recreation

2) Which ESs do you believe have declined?

☐ Crop production ☐ Livestock ☐ Soil conservation ☐ Water yield ☐ Sand fixation  
☐ Carbon sequestration ☐ Habitat ☐ Nature landscape recreation

**4. Cognition of the interviewees about the reasons behind the improvement or degradation of ESs**

The following items are reasons behind the changes in ESs. Please mark your answer for each ES change in Table S2.

**Table S2.** Reasons for the improvement or degradation of ESs.

| ESs                  | Reasons of ES change                     |                                         |                                        |
|----------------------|------------------------------------------|-----------------------------------------|----------------------------------------|
| Crop production      | <input type="checkbox"/> Land use change | <input type="checkbox"/> Climate change | <input type="checkbox"/> Other reasons |
| Livestock            | <input type="checkbox"/> Land use change | <input type="checkbox"/> Climate change | <input type="checkbox"/> Other reasons |
| Soil conservation    | <input type="checkbox"/> Land use change | <input type="checkbox"/> Climate change | <input type="checkbox"/> Other reasons |
| Water yield          | <input type="checkbox"/> Land use change | <input type="checkbox"/> Climate change | <input type="checkbox"/> Other reasons |
| Sand fixation        | <input type="checkbox"/> Land use change | <input type="checkbox"/> Climate change | <input type="checkbox"/> Other reasons |
| Carbon sequestration | <input type="checkbox"/> Land use change | <input type="checkbox"/> Climate change | <input type="checkbox"/> Other reasons |
| Habitat              | <input type="checkbox"/> Land use change | <input type="checkbox"/> Climate change | <input type="checkbox"/> Other reasons |

|                             |                                          |                                         |                                        |
|-----------------------------|------------------------------------------|-----------------------------------------|----------------------------------------|
| Nature landscape recreation | <input type="checkbox"/> Land use change | <input type="checkbox"/> Climate change | <input type="checkbox"/> Other reasons |
|-----------------------------|------------------------------------------|-----------------------------------------|----------------------------------------|

**Table S3.** Basic information about the sample points of the questionnaire survey.

| ID | Longitude | Latitude | Altitude | Names of the sample points                                              |
|----|-----------|----------|----------|-------------------------------------------------------------------------|
| 1  | 85.25     | 43.91    | 2599.77  | Antler Bay, Bor Tungge Prairie, Shawan County                           |
| 2  | 86.09     | 43.73    | 2565.78  | Head of Qingshui River                                                  |
| 3  | 86.05     | 43.81    | 2283.49  | Kazakh Nationality Township of Qingshui River                           |
| 4  | 85.79     | 44.13    | 804.76   | Bor Tungge Township of Shawan County                                    |
| 5  | 85.39     | 44.06    | 1152.44  | Dongwan Township of Shawan County                                       |
| 6  | 86.06     | 43.98    | 1143.37  | Kensiwate of Manas County                                               |
| 7  | 85.81     | 44.30    | 478.23   | 143 Group of 8th Division of Xinjiang Production and Construction Corps |
| 8  | 85.78     | 44.35    | 423.76   | 143 Group of 8th Division of Xinjiang Production and Construction Corps |
| 9  | 86.01     | 44.29    | 467.14   | Urban area of Shihezi                                                   |
| 10 | 86.09     | 44.27    | 526.25   | Urban area of Shihezi                                                   |
| 11 | 86.06     | 44.39    | 406.32   | Beiquan Township of Shihezi                                             |
| 12 | 86.10     | 44.47    | 388.35   | Beiquan Township of Shihezi                                             |
| 13 | 86.16     | 44.54    | 397.18   | 147 Group of 8th Division of Xinjiang Production and Construction Corps |
| 14 | 86.15     | 44.62    | 370.88   | 147 Group of 8th Division of Xinjiang Production and Construction Corps |
| 15 | 85.53     | 44.67    | 362.39   | 121 Group of 8th Division of Xinjiang Production and Construction Corps |
| 16 | 85.42     | 44.87    | 325.86   | 121 Group of 8th Division of Xinjiang Production and Construction Corps |
| 17 | 85.53     | 44.87    | 329.08   | 121 Group of 8th Division of Xinjiang Production and Construction Corps |
| 18 | 86.18     | 44.91    | 349.51   | 148 Group of 8th Division of Xinjiang Production and Construction Corps |
| 19 | 86.28     | 44.86    | 354.66   | 149 Group of 8th Division of Xinjiang Production and Construction Corps |
